# Supplementary material for: Functionalization of Ti-40Nb implant material with strontium by reactive sputtering
Source: PubMed Central journal article supplement (PMC5634847; doi:10.1186/s40824-017-0104-8), 2017-10-10
Supplement: 40824_2017_104_MOESM1_ESM.pdf [file 40824_2017_104_MOESM1_ESM.pdf]

# Functionalization of Ti-40Nb Implant Material with Strontium by Reactive Sputtering

Markus Goettlicher<sup>1</sup>, Marcus Rohnke<sup>1</sup>, Yannik Moryson<sup>1</sup>, Jürgen Thomas<sup>2</sup>, Joachim Sann<sup>1</sup>, Anja Lode<sup>3</sup>, Matthias Schumacher<sup>3</sup>, Romy Schmidt<sup>2</sup>, Stefan Pilz<sup>2</sup>, Annett Gebert<sup>2</sup>, Thomas Gemming<sup>2</sup>, Jürgen Janek<sup>1</sup>

<sup>1</sup> Institute of Physical Chemistry & Center of Materials Research, Justus-Liebig-University of Giessen, Heinrich-Buff-Ring 17, 35392 Giessen, Germany

<sup>2</sup> IFW Dresden, Institute for Complex Materials, Helmholtzstrasse 20, 01069 Dresden, Germany

<sup>3</sup> Centre for Translational Bone, Joint and Soft Tissue Research, Faculty of Medicine and University Hospital, Technische Universität Dresden, Fetscherstrasse 74, 01307 Dresden, Germany

## X-ray diffraction pattern of surface coating

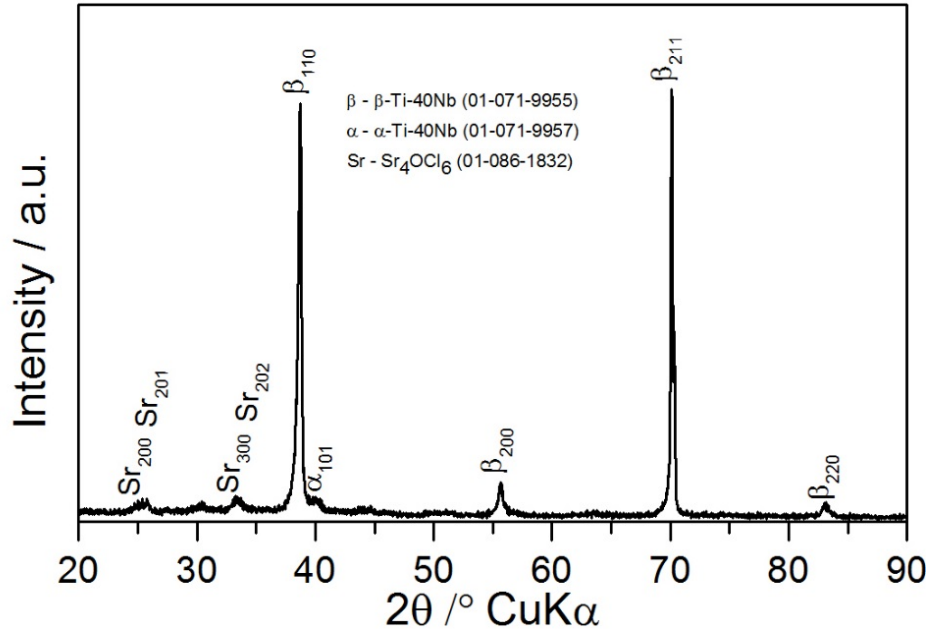

Fig. 1: Grazing incidence diffraction pattern of the deposited layer, incidence angle 2°, in brackets: number of the PDF (powder diffraction file) retrieved from the ICSD database.
